# Supplementary material for: Recombination-Independent Recognition of DNA Homology for Repeat-Induced Point Mutation (RIP) Is Modulated by the Underlying Nucleotide Sequence
Source: PubMed Central journal article supplement (PMC4858203; doi:10.1371/journal.pgen.1006015), 2016-05-05
Supplement: pgen.1006015.s001.pdf [file pgen.1006015.s001.pdf]

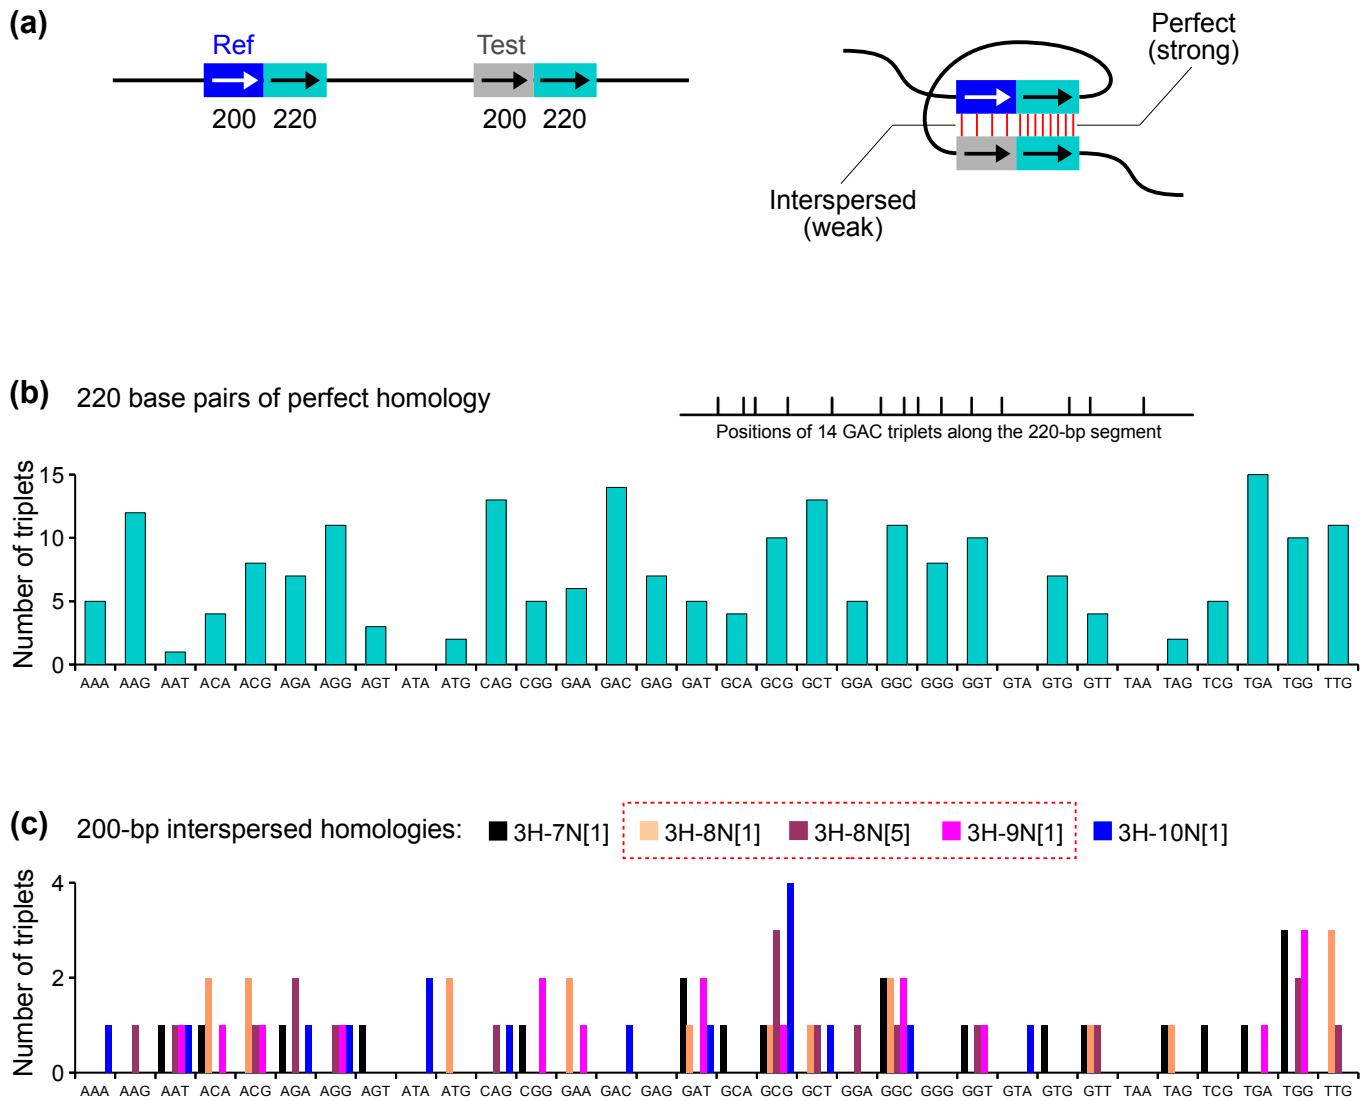

**S1 Fig. Analysis of 200-bp interspersed homologies adjacent to the 220-bp region of perfect homology, as described in [14]**

(a) The basic repeat construct.

(b) All possible triplets that occur within the 220-bp region of perfect homology (analyzed as in Fig 6a).

(c) All possible triplets that occur in the “3H” units of interspersed homologies examined in [14]. “RIP-proficient” interspersed homologies are outlined in dashed red.
